# Supplementary material
Source: publisher site journal article supplement (https://journals.iucr.org/services/coeditors/meetings/jmb/2024/AppendixH.pdf)
Supplement: Supplementary file 1 [file AppendixH.pdf]

**APPENDIX H: MEETINGS 2024**

| MEETING                                                                | LOCATION                  | DATE          | SUPPORTED BY THE IUCr | IUCr PARTICIPATION                               | NOTES                                                                                                                                                                                                                      |
|------------------------------------------------------------------------|---------------------------|---------------|-----------------------|--------------------------------------------------|----------------------------------------------------------------------------------------------------------------------------------------------------------------------------------------------------------------------------|
| <a href="#">DGK2024</a>                                                | Bayreuth, Germany         | 17–21 Mar     | No                    | Staffed booth                                    | Plenary speakers: Marc de Boissieu (B) and Randy Read (D)<br>Also attending: Kristina Kvashnina (JSR)<br>Meet-the-Editor sessions?<br>Fragment screening (Manfred Weiss)<br>Video interviews, e.g. Young Crystallographers |
| <a href="#">XTOP2024</a>                                               | Carry-le-Rouet, France    | 17–22 Mar     | Yes                   |                                                  |                                                                                                                                                                                                                            |
| <a href="#">BCA2024</a>                                                | Leeds, UK                 | 25–28 Mar     | No                    | Staffed booth<br>Poster prize<br>IUCrData poster | Attending: Simon Coles, John Helliwell (IUCrData)                                                                                                                                                                          |
| <a href="#">HTCC6</a>                                                  | Dubrovnik, Croatia        | 7–12 Apr      | Yes                   |                                                  |                                                                                                                                                                                                                            |
| <a href="#">RapiData 2024</a>                                          | Menlo Park, CA, USA       | 29 Apr–4 May  | Yes                   |                                                  |                                                                                                                                                                                                                            |
| <a href="#">5th Turkish Crystallographic Meeting</a>                   | Samsun, Türkiye           | 17–19 May     | Yes                   |                                                  |                                                                                                                                                                                                                            |
| <a href="#">18th International Symposium on Metal-Hydrogen Systems</a> | Saint-Malo, France        | 26–31 May     | Yes                   |                                                  | Important area to capture in the journals                                                                                                                                                                                  |
| <a href="#">Erice School 2024</a>                                      | Erice, Italy              | 31 May–8 Jun  | Yes                   |                                                  | Powder Diffraction: Advancing Real Materials in the Information Era                                                                                                                                                        |
| <a href="#">FEBS 2024 Advanced Course</a>                              | Ceske Budejovice, Czechia | 9–15 Jun      | TBC                   |                                                  | Advanced methods in macromolecular crystallization                                                                                                                                                                         |
| <a href="#">Zurich School 2024</a>                                     | Zurich, Switzerland       | 17–29 Jun     | Yes                   |                                                  |                                                                                                                                                                                                                            |
| <a href="#">2024 ACA Summer Course in Chemical Crystallography</a>     | West Lafayette, IN, USA   | 23–30 Jun     | Yes                   |                                                  |                                                                                                                                                                                                                            |
| <a href="#">9th European Crystallography School</a>                    | Nancy, France             | 24–30 Jun     | Yes                   |                                                  |                                                                                                                                                                                                                            |
| <a href="#">AFC2024</a>                                                | Montpellier, France       | 2–5 Jul       | No                    | Ad in programme book                             |                                                                                                                                                                                                                            |
| <a href="#">BZA2024</a>                                                | Ambleside, UK             | 2–5 Jul       | No                    | Poster prize                                     |                                                                                                                                                                                                                            |
| <a href="#">ACA2024</a>                                                | Denver, CO, USA           | 7–12 Jul      | TBC                   | Staffed booth<br>Poster prize                    |                                                                                                                                                                                                                            |
| <a href="#">ESCG-4</a>                                                 | Jachranka, Poland         | 17–20 Jul     | TBC                   |                                                  |                                                                                                                                                                                                                            |
| <a href="#">ECCG-8</a>                                                 | Warsaw, Poland            | 21–25 Jul     | TBC                   |                                                  |                                                                                                                                                                                                                            |
| <a href="#">MaThCryst7</a>                                             | Lima, Peru                | 12–16 Aug     | Yes                   |                                                  |                                                                                                                                                                                                                            |
| <a href="#">ECM34</a>                                                  | Padova, Italy             | 26–30 Aug     | TBC                   | Staffed booth<br>Poster prizes                   |                                                                                                                                                                                                                            |
| <a href="#">EPDIC18</a>                                                | Padova, Italy             | 30 Aug–2 Sept | TBC                   | Staffed booth<br>Poster prize                    |                                                                                                                                                                                                                            |
| <a href="#">LACA VI</a>                                                | Montevideo, Uruguay       | 23–26 Sept    | TBC                   |                                                  |                                                                                                                                                                                                                            |
| 26th Heart of Europe Bio-Crystallography Meeting (HEC26)               | Krakow, Poland            | 26–28 Sept    | No                    | Student talk prizes                              |                                                                                                                                                                                                                            |
| <a href="#">SAS2024</a>                                                | Taipei, Taiwan            | 3–8 Nov       | TBC                   |                                                  | Guinier Prize, JAC article collection                                                                                                                                                                                      |
| <a href="#">AsCA2024</a>                                               | Selangor, Malaysia        | 1–6 Dec       | TBC                   | Staffed booth                                    |                                                                                                                                                                                                                            |
